# Supplementary material
Source: HighWire-hosted journal article supplement (https://care.diabetesjournals.org/content/suppl/2007/08/14/dc06-2532)

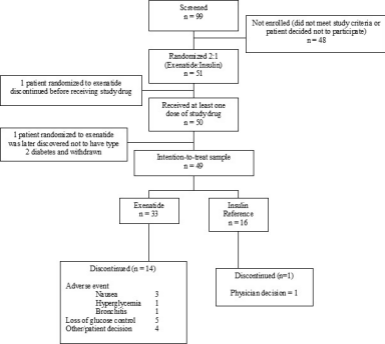

Supplement: DC062532DispositionAppendixFigure1.pdf [file DC062532DispositionAppendixFigure1.pdf]
